# Supplementary material for: Conversion of high-ash microalgae through hydrothermal liquefaction
Source: Royal Society of Chemistry journal article supplement (doi:10.1039/c9se01114e), 2020-01-01
Supplement: c9se01114e1.pdf [file c9se01114e1.pdf]

Table S1 Compounds identified in light oil derived from NM and DA at different temperature.

| NO. | Retention time(min) | Compounds                                  | Peak area (%) |        |        |        |        |        |
|-----|---------------------|--------------------------------------------|---------------|--------|--------|--------|--------|--------|
|     |                     |                                            | NM-260        | NM-300 | NM-340 | DA-260 | DA-300 | DA-340 |
| 1   | 2.27                | 2-Butanone                                 | -             | 5.52   | -      | 1.48   | 0.63   | -      |
| 2   | 2.27                | 5,9-Dodecadien-2-one, 6,10-dimethyl-       | -             | -      | -      | -      | -      | 2.81   |
| 3   | 2.82                | Pentanal, 2-methyl-                        | 2.17          | -      | -      | -      | -      | -      |
| 4   | 2.82                | Carbonic acid, hexyl prop-1-en-2-yl ester  | -             | -      | -      | 0.38   | -      | -      |
| 5   | 2.82                | Methyl Isobutyl Ketone                     | -             | -      | 3.43   | -      | -      | 1.16   |
| 6   | 2.84                | 2-Pentanone                                | -             | -      | -      | -      | -      | 0.94   |
| 7   | 2.91                | Butanal, 2-methyl-                         | -             | 4.01   | -      | 1.09   | -      | -      |
| 8   | 2.92                | 1-Methyl-1-silacyclobutane                 | -             | -      | -      | -      | -      | 0.25   |
| 9   | 2.92                | Pentanal, 2,4-dimethyl-                    | -             | -      | -      | -      | 0.39   | -      |
| 10  | 4.04                | 1H-Pyrrole, 1-methyl-                      | -             | 2.39   | -      | -      | -      | -      |
| 11  | 4.37                | Pyridine                                   | -             | 2.34   | -      | -      | -      | 0.29   |
| 12  | 5.18                | Cyclopentanone                             | 5.12          | 8.37   | -      | 0.94   | 1.56   | 2.50   |
| 13  | 5.89                | Pyridine, 2-methyl-                        | -             | -      | -      | -      | -      | 0.67   |
| 14  | 6.15                | Pyrazine, methyl-                          | -             | 2.78   | -      | 0.35   | 0.64   | 2.01   |
| 15  | 6.47                | Cyclopentanone, 2-methyl-                  | 1.94          | 3.38   | -      | 0.28   | 0.52   | 1.62   |
| 16  | 6.69                | (R)-(+)-3-Methylcyclopentanone             | -             | -      | -      | -      | -      | 0.64   |
| 17  | 6.71                | Cyclopentanone, 3-methyl-                  | -             | 1.75   | -      | -      | -      | -      |
| 18  | 8.01                | Cyclohexanone                              | -             | 2.35   | -      | -      | 0.45   | 0.85   |
| 19  | 8.36                | 2-Cyclopenten-1-one, 2-methyl-             | 11.79         | 13.06  | -      | 4.41   | 5.69   | 5.52   |
| 20  | 8.65                | Pyrazine, 2,5-dimethyl-                    | -             | -      | -      | 0.74   | -      | -      |
| 21  | 8.67                | 1,4-Benzenediamine                         | -             | -      | -      | -      | -      | 1.79   |
| 22  | 8.68                | Pyrazine, 2,6-dimethyl-                    | 0.95          | 4.35   | -      | -      | 0.86   | 1.31   |
| 23  | 8.71                | Pyrimidine, 4,6-dimethyl-                  | -             | -      | -      | 1.59   | 0.47   | -      |
| 24  | 8.80                | 2-Methyl-1-vinylimidazole                  | -             | 3.79   | -      | -      | -      | -      |
| 25  | 9.58                | 1-Methylcycloheptene                       | -             | -      | -      | -      | -      | 0.15   |
| 26  | 10.38               | 2-Cyclopenten-1-one, 3-methyl-             | -             | 3.00   | -      | -      | 0.99   | 2.44   |
| 27  | 10.73               | 3-Pentenoic acid, 4-methyl-                | -             | -      | -      | -      | 0.37   | -      |
| 28  | 11.08               | 2-Cyclopenten-1-one, 3,4-dimethyl-         | -             | 1.66   | -      | -      | -      | 0.94   |
| 29  | 11.17               | 6-Methyl-3-heptyne                         | -             | 4.17   | -      | -      | -      | -      |
| 30  | 11.18               | 4-Aminopyridine                            | -             | -      | -      | -      | 1.26   | 1.31   |
| 31  | 11.21               | 2-Cyclopenten-1-one, 2,3-dimethyl-         | 11.82         | 14.14  | -      | 0.33   | 2.73   | 3.39   |
| 32  | 11.25               | Phenol                                     | -             | -      | -      | -      | 1.06   | 1.54   |
| 33  | 11.26               | Pyrazine, 2-ethyl-6-methyl-                | -             | 1.99   | -      | -      | -      | 1.08   |
| 34  | 11.41               | 1,3-Benzenediamine, 2-methyl-              | -             | -      | -      | -      | 1.74   | -      |
| 35  | 11.47               | 1,2-Benzenediamine, 4-methyl-              | -             | -      | -      | 0.55   | -      | 1.41   |
| 36  | 11.56               | 3-Amino-1,2,4-triazole-5-carboxylic acid   | 3.88          | -      | -      | -      | -      | -      |
| 37  | 12.02               | Cyclopentene, 1-(1-methylethyl)-           | -             | 2.98   | -      | -      | -      | -      |
| 38  | 12.54               | 2-Pyrrolidinone, 1-methyl-                 | -             | -      | -      | -      | -      | 5.27   |
| 39  | 13.10               | 2-Cyclopenten-1-one, 3,4,5-trimethyl-      | -             | -      | -      | -      | -      | 0.67   |
| 40  | 13.17               | Ethanone, 1-(2-methyl-1-cyclopenten-1-yl)- | -             | 3.02   | -      | -      | -      | -      |
| 41  | 13.69               | 2-Cyclopenten-1-one, 3-ethyl-              | -             | -      | -      | -      | -      | 1.14   |

|    |       |                                                            |   |      |   |      |      |      |
|----|-------|------------------------------------------------------------|---|------|---|------|------|------|
| 42 | 13.98 | Ethanone, 1-(1-cyclohexen-1-yl)-                           | - | -    | - | -    | -    | 2.02 |
| 43 | 14.00 | 2-Cyclopenten-1-one, 2,3,4-trimethyl-                      | - | -    | - | -    | 0.57 | -    |
| 44 | 14.02 | Phenol, 2-methoxy-                                         | - | 5.20 | - | -    | -    | -    |
| 45 | 14.04 | p-Cresol                                                   | - | -    | - | -    | -    | 1.36 |
| 46 | 14.07 | 3-Heptyne, 2,2-dimethyl-                                   | - | -    | - | -    | 0.08 | -    |
| 47 | 14.15 | Allyldiethylamine                                          | - | -    | - | -    | -    | 0.84 |
| 48 | 14.20 | 3-Penten-2-one, 4-(methylamino)-                           | - | -    | - | -    | -    | 2.18 |
| 49 | 14.26 | Isobutyl ethylphosphonofluoridate                          | - | -    | - | -    | 0.75 | -    |
| 50 | 14.32 | 2,5-Pyrrolidinedione, 1-methyl-                            | - | -    | - | -    | 0.68 | -    |
| 51 | 14.36 | Cyclopentene, 3-methyl-1-(1-methylethyl)-                  | - | 0.07 | - | -    | -    | 1.12 |
| 52 | 14.40 | Caprolactam                                                | - | -    | - | 0.27 | -    | -    |
| 53 | 14.49 | 1-Ethyl-2-pyrrolidinone                                    | - | -    | - | -    | -    | 4.39 |
| 54 | 14.63 | 3-Quinuclidinol                                            | - | -    | - | -    | -    | 4.36 |
| 55 | 14.66 | Pyrazole, 1-methyl-4-nitro-                                | - | -    | - | -    | 2.52 | -    |
| 56 | 14.71 | 1H-Imidazole, 1-methyl-4-nitro-                            | - | -    | - | 0.98 | -    | -    |
| 57 | 15.00 | Cycloheptylamine                                           | - | -    | - | -    | -    | 1.69 |
| 58 | 15.01 | 4-Methylcyclohexylamine                                    | - | -    | - | -    | 0.76 | -    |
| 59 | 15.21 | Pyrazine, 2-methoxy-3-methyl-                              | - | -    | - | -    | -    | 1.58 |
| 60 | 15.24 | 3-Octyne, 2-methyl-                                        | - | -    | - | -    | 1.04 | -    |
| 61 | 15.29 | 4,6-Dimethyl-2-pyrimidone                                  | - | 3.32 | - | -    | -    | -    |
| 62 | 15.49 | 2,5-Pyrrolidinedione, 1-ethyl-                             | - | -    | - | -    | 1.67 | 1.31 |
| 63 | 15.80 | Dexrazoxane                                                | - | -    | - | -    | 1.42 | 1.22 |
| 64 | 15.84 | Imidazole, 1,4-dimethyl-2-nitro-                           | - | -    | - | 0.49 | -    | -    |
| 65 | 15.88 | 3-Penten-2-one, 4-(dimethylamino)-                         | - | -    | - | -    | -    | 0.66 |
| 66 | 16.01 | Heptane, 4-methylene-                                      | - | -    | - | -    | -    | 0.50 |
| 67 | 16.02 | Cyclooctanamine                                            | - | -    | - | -    | 0.56 | -    |
| 68 | 16.18 | (E)-3-(Dimethylamino)-2-pentene                            | - | -    | - | -    | -    | 1.15 |
| 69 | 16.74 | Cyclopentanone, 2,2-dimethyl-                              | - | -    | - | -    | -    | 0.48 |
| 70 | 16.77 | 1-Heptene, 2,6-dimethyl-                                   | - | -    | - | -    | 0.65 | -    |
| 71 | 16.97 | 1,3-Diazatricyclo[3.3.1.1]decane                           | - | -    | - | -    | -    | 0.75 |
| 72 | 17.18 | 4-Pyranone, 2,3-dihydro-                                   | - | -    | - | -    | -    | 1.17 |
| 73 | 17.32 | 3,4-Methylpropylsuccinimide                                | - | -    | - | -    | -    | 1.66 |
| 74 | 17.36 | .alpha.-Methyl-.alpha.-propylsuccinimide                   | - | -    | - | -    | 0.87 | -    |
| 75 | 17.45 | 1-Propylpiperidine                                         | - | -    | - | -    | -    | 0.44 |
| 76 | 17.53 | 4-Amino-2,6-dihydroxypyrimidine                            | - | -    | - | -    | -    | 1.67 |
| 77 | 17.54 | Propylphosphonic acid, fluoroanhydride, 2-ethylhexyl ester | - | -    | - | -    | 2.27 | -    |
| 78 | 17.60 | Pyrrolidine, 1-(1-oxopropyl)-                              | - | -    | - | 0.64 | -    | -    |
| 79 | 18.56 | 3-Piperidinone, 1-ethyl-6-methyl-                          | - | -    | - | -    | 0.71 | 3.41 |
| 80 | 19.23 | 3-Amino-5-tert-butylpyrazole                               | - | -    | - | -    | -    | 0.66 |
| 81 | 19.28 | Oxazole, 2,5-diethyl-4-methyl-                             | - | -    | - | -    | 0.60 | -    |
| 82 | 19.46 | N-[2-Hydroxyethyl]succinimide                              | - | -    | - | 0.68 | 2.01 | 2.21 |
| 83 | 19.75 | Tetrapropylammonium bromide                                | - | -    | - | -    | -    | 0.51 |
| 84 | 19.76 | Piperazine, 1,4-dimethyl-                                  | - | -    | - | -    | 0.49 | -    |

|     |       |                                                                 |       |      |       |       |       |   |      |
|-----|-------|-----------------------------------------------------------------|-------|------|-------|-------|-------|---|------|
| 85  | 20.52 | Benzenamine, 3,5-dimethoxy-                                     | -     | -    | -     | -     | -     | - | 0.58 |
| 86  | 21.05 | Resorcinol, 2TMS derivative                                     | -     | -    | -     | -     | 0.08  | - | 1.24 |
| 87  | 21.44 | 2-Pyrrolidinemethanamine, 1-ethyl-                              | -     | -    | -     | -     | -     | - | 5.54 |
| 88  | 21.51 | Piperidine, 1-methyl-                                           | -     | -    | -     | -     | 1.30  | - | -    |
| 89  | 21.60 | 2-Propanone, 1-(1-methyl-2-piperidinyl)-                        | -     | 3.02 | -     | -     | -     | - | -    |
| 90  | 22.36 | Benzoxazole, 2-[2-(4-morpholyl)ethyl]thio-                      | -     | -    | -     | -     | -     | - | 0.98 |
| 91  | 22.38 | 2,5-Pyrrolidinedione, 1-butyl-                                  | -     | -    | -     | -     | 1.32  | - | -    |
| 92  | 22.41 | 1-Piperidinecarboxaldehyde                                      | -     | -    | -     | 0.42  | -     | - | -    |
| 93  | 22.54 | O-Ethyl S-2-diisopropylaminoethyl ethylphosphonothiolate        | -     | -    | -     | -     | -     | - | 1.00 |
| 94  | 22.57 | Propyl S-2-(dipropylamino)ethyl propylphosphonothiolate         | -     | -    | -     | 0.58  | -     | - | -    |
| 95  | 30.93 | 2-Methyl-3-(methylthio) furan                                   | -     | -    | -     | 0.52  | -     | - | -    |
| 96  | 30.97 | 3,3-Diacetyl-2,3,4,5-tetrahydro-2-oxofuran                      | -     | -    | -     | 0.30  | -     | - | -    |
| 97  | 31.13 | 4'-Methyl- $\alpha$ -pyrrolidinopropiophenone                   | -     | -    | -     | -     | -     | - | 1.53 |
| 98  | 31.17 | Butylamine, 3-methyl-1-[5-tetrazolyl]-                          | -     | -    | -     | -     | 0.67  | - | -    |
| 99  | 31.37 | 1-Phenethyl-pyrrolidin-2,4-dione                                | -     | -    | -     | -     | 0.62  | - | -    |
| 100 | 32.59 | L-Proline, N-valeryl-, decyl ester                              | -     | -    | -     | 1.78  | -     | - | -    |
| 101 | 32.59 | l-Proline, N-allyloxycarbonyl-, hexyl ester                     | -     | -    | -     | -     | 1.62  | - | -    |
| 102 | 32.63 | 1,2-Cyclopentanedione, 3,3,5,5-tetramethyl-                     | -     | -    | -     | -     | -     | - | 0.59 |
| 103 | 32.80 | l-Norvaine, N-allyloxycarbonyl-, decyl ester                    | -     | -    | -     | -     | -     | - | 1.22 |
| 104 | 32.83 | 2H-imidazole-2-thione, 1,3-dihydro-4-(2-methylpropyl)-          | 11.18 | -    | -     | 8.53  | -     | - | -    |
| 105 | 32.89 | Hydantoin, 1-butyl-                                             | -     | -    | -     | -     | 7.41  | - | -    |
| 106 | 32.90 | 3,6-Diisopropylpiperazin-2,5-dione                              | -     | -    | 13.63 | 3.77  | 0.62  | - | -    |
| 107 | 33.19 | Diethyltrisulphide                                              | -     | -    | -     | 18.12 | 7.06  | - | 3.02 |
| 108 | 33.22 | 5-Chloro-2,3-dihydro-1-benzofuran                               | 8.86  | -    | -     | -     | -     | - | -    |
| 109 | 33.30 | Phenol, 3,5-dimethoxy-                                          | -     | -    | 16.84 | 0.80  | -     | - | 1.38 |
| 110 | 33.88 | Benzene, 1,3,5-trimethoxy-                                      | -     | -    | -     | -     | 0.77  | - | 0.36 |
| 111 | 34.53 | 4,4-Dimethyl-2,5-dioxo-1-vinylimidazolidine                     | -     | -    | -     | -     | 0.88  | - | -    |
| 112 | 34.73 | l-Proline, N-butoxycarbonyl-, isohexyl ester                    | -     | -    | -     | -     | -     | - | 0.71 |
| 113 | 34.76 | d-Proline, N-isobutoxycarbonyl-, butyl ester                    | 8.19  | -    | -     | -     | -     | - | -    |
| 114 | 34.80 | l-Proline, N-isobutoxycarbonyl-, tridecyl ester                 | -     | -    | -     | -     | 4.06  | - | -    |
| 115 | 34.81 | 2H-Naphtho[1,8-bc]furan-2-one                                   | -     | -    | 12.28 | -     | -     | - | -    |
| 116 | 34.82 | l-Proline, N-isobutoxycarbonyl-, nonyl ester                    | -     | -    | -     | 3.57  | -     | - | -    |
| 117 | 34.93 | l-Leucine, N-cyclopropylcarbonyl-, heptadecyl ester             | 3.12  | -    | -     | -     | 0.73  | - | -    |
| 118 | 35.09 | 6,6-Dimethyl-cyclohex-2-en-1-ol                                 | -     | -    | -     | -     | -     | - | 1.52 |
| 119 | 35.13 | 5-Isopropylidene-3,3-dimethyl-dihydrofuran-2-one                | 11.60 | -    | 26.65 | -     | -     | - | -    |
| 120 | 35.20 | 2-Hydroxy-3,5,5-trimethyl-cyclohex-2-enone                      | -     | -    | 12.76 | -     | -     | - | -    |
| 121 | 35.20 | Pyrrolo[1,2-a]pyrazine-1,4-dione, hexahydro-3-(2-methylpropyl)- | 10.86 | -    | 14.42 | 10.41 | 15.18 | - | -    |
| 122 | 35.20 | 5,10-Diethoxy-2,3,7,8-tetrahydro-1H,6H-                         | -     | 1.22 | -     | 3.95  | -     | - | 0.83 |

|     |       |                                                                            |      |   |   |      |      |      |
|-----|-------|----------------------------------------------------------------------------|------|---|---|------|------|------|
| 123 | 35.21 | dipyrrolo[1,2-a:1',2'-d]pyrazine<br>(2S,6R)-2,6-Dibutyl-4-methylpiperidine | -    | - | - | 4.94 | 5.04 | -    |
| 124 | 38.64 | 2,5-Piperazinedione, 3-methyl-6-(phenylmethyl)-                            | -    | - | - | 1.31 | -    | -    |
| 125 | 40.40 | 2,5-Piperazinedione, 3-benzyl-6-isopropyl-                                 | -    | - | - | 9.29 | 5.29 | -    |
| 126 | 40.60 | 3,6-Dibutyl-1,2-dihydro-1,2,4,5-tetrazine                                  | -    | - | - | 0.78 | -    | -    |
| 127 | 42.04 | 2,5-Piperazinedione, 3-(phenylmethyl)-                                     | -    | - | - | 5.23 | -    | -    |
| 128 | 42.30 | Pyrrolo[1,2-a]pyrazine-1,4-dione, hexahydro-3-(phenylmethyl)-              | 4.05 | - | - | 5.96 | 5.22 | 0.45 |
| 129 | 42.44 | Cyclo-(1-leucyl-1-phenylalanyl)                                            | -    | - | - | 2.54 | 0.94 | -    |
| 130 | 42.59 | 2,5-Piperazinedione, 3-(hydroxymethyl)-6-(phenylmethyl)-                   | -    | - | - | 1.01 | 2.26 | -    |
| 131 | 42.73 | 2,4-Difluorobenzoic acid, 3,5-difluophenyl ester                           | -    | - | - | 0.98 | -    | -    |

Table S2 Compounds identified in heavy oil derived from DA at different temperature.

| NO. | Retention time(min) | Compounds                                            | Peak area (%) |        |        |
|-----|---------------------|------------------------------------------------------|---------------|--------|--------|
|     |                     |                                                      | DA-260        | DA-300 | DA-340 |
| 1   | 4.27                | 4-Penten-2-one, 4-methyl-                            | 0.80          | -      | -      |
| 2   | 5.31                | 3-Penten-2-one, 4-methyl-                            | 3.77          | 1.07   | -      |
| 3   | 6.44                | 2-Pentanone, 4-hydroxy-4-methyl-                     | 3.00          | 1.47   | 3.12   |
| 4   | 7.33                | Piperazine, 1-methyl-                                | 0.76          | -      | -      |
| 5   | 13.63               | 4H-1,2,4-Triazol-3-amine, 4-propyl-                  | 0.51          | -      | -      |
| 6   | 14.90               | 4-Piperidinone, 2,2,6,6-tetramethyl-                 | 2.26          | 1.12   | 1.01   |
| 7   | 19.98               | 1-Tridecene                                          | 0.44          | 0.41   | 0.47   |
| 13  | 20.40               | 2-Butenal, 3-methyl-, dimethylhydrazone              | 0.37          | -      | -      |
| 8   | 21.51               | Piperidine, 1-methyl-                                | -             | -      | 1.84   |
| 9   | 22.54               | Piperazine, 1,4-dimethyl-                            | -             | -      | 0.86   |
| 12  | 22.55               | 2,3,4-Trimethyl-isoxazol-5(2H)-one                   | -             | 0.75   | -      |
| 10  | 22.71               | Indole, 3-methyl-                                    | -             | -      | 0.32   |
| 11  | 25.07               | Benzonitrile, 2,4,6-trimethyl-                       | -             | -      | 0.80   |
| 14  | 25.21               | 1-Pentadecene                                        | 1.00          | 2.98   | 2.44   |
| 15  | 25.29               | 1H-Indole, 2,3-dimethyl-                             | -             | -      | 0.89   |
| 16  | 26.74               | Tridecane, 7-methylene-                              | -             | -      | 1.67   |
| 20  | 26.74               | Cetene                                               | -             | 1.14   | -      |
| 21  | 26.74               | Cyclododecane                                        | 0.27          | -      | -      |
| 17  | 26.82               | Ethanone, 1-(1H-indol-3-yl)-                         | -             | -      | 1.57   |
| 22  | 26.83               | 1H-Indole, 5,6,7-trimethyl-                          | -             | 1.41   | -      |
| 18  | 26.91               | 3H-Indole, 2,3,3-trimethyl-                          | -             | -      | 0.99   |
| 23  | 27.27               | 2-Oxopiperidine-3-carboxylic acid, methyl ester      | -             | 0.69   | -      |
| 19  | 27.27               | 1,2-Dithiepane                                       | -             | -      | 0.33   |
| 24  | 28.96               | 2-Methyl-3-(methylthio) furan                        | 0.67          | -      | -      |
| 25  | 29.11               | 2,3-Dimethyl-1H-imidazo(1,2-a)pyrrolo(3,2-e)pyridine | -             | 0.60   | 2.03   |

|    |       |                                                                          |       |       |       |
|----|-------|--------------------------------------------------------------------------|-------|-------|-------|
| 27 | 29.12 | 2(1H)-Pyridinone, 1-(2-methylphenyl)-                                    | 0.70  | -     | -     |
| 28 | 29.18 | 4-Ethoxy-6-methylhexahydropyrimidin-2-thione                             | 0.72  | -     | -     |
| 26 | 29.53 | 2-Thiaadamantan-4-ol                                                     | -     | -     | 1.00  |
| 29 | 29.89 | E-14-Hexadecenal                                                         | 0.71  | 1.98  | 2.68  |
| 30 | 30.05 | Heptadecane                                                              | 0.86  | 1.36  | 1.73  |
| 31 | 30.64 | cis-2-Nonene                                                             | -     | 1.80  | -     |
| 36 | 30.64 | Cyclopropane, 1-methyl-2-pentyl-                                         | 1.28  | -     | 1.82  |
| 45 | 30.87 | Octanoic acid, pyrrolidide                                               | 0.80  | -     | -     |
| 32 | 30.87 | Cyclohexane, 2-propyl-1,1,3-trimethyl-                                   | -     | 1.28  | -     |
| 37 | 30.87 | Cyclohexane, 1,2,3-trimethyl-                                            | -     | -     | 2.28  |
| 38 | 31.00 | Dodecane, 2,6,10-trimethyl-                                              | -     | -     | 1.02  |
| 46 | 31.00 | l-Alanine, N-pivaloyl-, methyl ester                                     | 1.56  | -     | -     |
| 33 | 31.01 | Tetradecane, 4-methyl-                                                   | -     | 0.93  | -     |
| 34 | 31.10 | 10H-Phenothiazine, 10-methyl-                                            | -     | 1.12  | -     |
| 39 | 31.12 | MDPPP                                                                    | -     | -     | 2.52  |
| 40 | 31.41 | Benzene, 4-pentynyl-                                                     | -     | -     | 2.39  |
| 47 | 31.42 | Tetradecanoic acid                                                       | 1.40  | -     | -     |
| 35 | 31.42 | 5-Hexadecenoic acid, 2-methoxy-, methyl ester                            | -     | 1.24  | -     |
| 41 | 31.88 | Cyclohexadecane, 1,2-diethyl-                                            | -     | -     | 1.98  |
| 48 | 31.88 | Cyclodecane                                                              | 0.69  | -     | -     |
| 42 | 32.20 | 2-Tridecanone                                                            | -     | -     | 0.54  |
| 43 | 32.57 | 2-Hexadecene, 2,6,10,14-tetramethyl-                                     | -     | -     | 1.39  |
| 44 | 32.67 | Cyclohexane, 1,2,3-trimethyl-, (1.alpha.,2.alpha.,3.beta.)-              | -     | -     | 0.48  |
| 49 | 32.80 | 2-Hexadecene, 3,7,11,15-tetramethyl-                                     | 4.31  | 7.31  | 7.83  |
| 51 | 32.89 | 2H-imidazole-2-thione, 1,3-dihydro-4-(2-methylpropyl)-                   | -     | 1.36  | -     |
| 50 | 32.92 | l-Proline, N-propoxycarbonyl-, pentyl ester                              | 2.66  | -     | -     |
| 53 | 33.24 | Benzenemethanol, 3-hydroxy-5-methoxy-                                    | -     | 0.78  | -     |
| 52 | 33.48 | Cyclopentanecarboxylic acid, 4-methylene-2-phenyl-, methyl ester, trans- | 0.98  | -     | -     |
| 54 | 33.55 | Salvial-4(14)-en-1-one                                                   | -     | 0.73  | 1.47  |
| 58 | 33.82 | (S)-6,6-Dimethyl-2-azaspiro[4.4]non-1-ene                                | 1.46  | 1.33  | -     |
| 57 | 34.12 | E-15-Heptadecenal                                                        | -     | 0.66  | -     |
| 55 | 34.12 | 1-Nonadecene                                                             | -     | -     | 0.84  |
| 56 | 34.28 | 5-Imidazoethylamine, N-[4'-hydroxy-3-phenylpropionyl]-                   | -     | -     | 1.34  |
| 59 | 34.76 | Hexadecanoic acid, methyl ester                                          | 0.36  | -     | 0.95  |
| 62 | 34.83 | l-Proline, N-butoxycarbonyl-, heptyl ester                               | 2.59  | 1.63  | -     |
| 63 | 34.97 | 2,5-Piperazinedione, 3,6-bis(2-methylpropyl)-                            | 0.88  | -     | -     |
| 64 | 35.11 | Palmitoleic acid                                                         | 1.87  | 4.29  | -     |
| 60 | 35.18 | Z-9-Pentadecenol                                                         | -     | -     | 2.17  |
| 65 | 35.19 | 2-Hydroxy-3,5,5-trimethyl-cyclohex-2-enone                               | 4.67  | -     | -     |
| 61 | 35.26 | 1-Dodecanethiol                                                          | -     | -     | 1.08  |
| 66 | 35.39 | Simazine                                                                 | -     | 0.64  | -     |
| 67 | 35.55 | n-Hexadecanoic acid                                                      | 17.56 | 18.38 | 15.41 |
| 68 | 35.73 | Indan, 1-(2-methylpropenyl)-2-thiocyanato-                               | -     | -     | 0.90  |

|     |       |                                                                |       |      |       |
|-----|-------|----------------------------------------------------------------|-------|------|-------|
| 70  | 35.99 | 9H-Pyrido[3,4-b]indole, 1-methyl-                              | -     | 1.14 | -     |
| 71  | 38.16 | 2(3H)-Furanone, dihydro-5-tetradecyl-                          | -     | 0.75 | -     |
| 69  | 38.16 | 6-Octadecenoic acid                                            | -     | -    | 1.18  |
| 72  | 38.44 | 3-Methyl-2-(3,7,11-trimethyldodecyl)thiophene                  | 0.71  | 1.15 | 1.22  |
| 73  | 38.81 | Octadec-9-enoic acid                                           | -     | 1.92 | 2.93  |
| 74  | 38.81 | Oleic Acid                                                     | 3.64  | -    | 10.87 |
| 75  | 38.92 | 9-Octadecenoic acid, (E)-                                      | 14.19 | 7.06 | -     |
| 76  | 39.01 | Bicyclo[8.2.0]dodecan-11-one, 12-chloro-                       | -     | 3.93 | -     |
| 77  | 39.24 | cis-Vaccenic acid                                              | -     | 2.92 | -     |
| 78  | 39.53 | Hexadecanamide                                                 | 3.15  | 5.52 | -     |
| 84  | 40.16 | N-Methyldodecanamide                                           | 1.26  | 2.46 | -     |
| 79  | 40.16 | Myristamide, N-methyl-                                         | 1.07  | -    | 1.96  |
| 80  | 40.40 | 2,5-Piperazinedione, 3-benzyl-6-isopropyl-                     | 1.99  | -    | -     |
| 85  | 40.88 | Myristamide, N-ethyl-                                          | 3.72  | 1.29 | -     |
| 81  | 40.88 | Octanamide, N,N-dimethyl-                                      | 0.66  | -    | 1.18  |
| 82  | 42.03 | 3,4-Difluoropropiophenone                                      | 2.31  | -    | -     |
| 83  | 42.23 | Pyrrrolo[1,2-a]pyrazine-1,4-dione, hexahydro-3-(phenylmethyl)- | 0.43  | -    | -     |
| 86  | 42.43 | Cyclo-(1-leucyl-1-phenylalanyl)                                | 1.26  | 0.94 | -     |
| 89  | 42.61 | 9-Octadecenamide, (Z)-                                         | 3.72  | 4.61 | 2.72  |
| 90  | 43.05 | Octadecanamide                                                 | 0.29  | 0.93 | 4.70  |
| 92  | 43.15 | 1- $\beta$ -D-Ribofuranosyl-1,2,4-triazole-3(2H)-one           | 0.19  | 1.01 | -     |
| 87  | 43.21 | 1,3-Dioxane, 4,5-dimethyl-2-pentadecyl-                        | -     | -    | 0.72  |
| 91  | 43.21 | Dodecanamide, N-butyl-                                         | 0.17  | 1.05 | -     |
| 88  | 43.25 | N-(1-Cyclopropylethyl)cyclohexanamine, TMS derivative          | -     | -    | 0.45  |
| 93  | 43.35 | Phenol, 2,2'-methylenebis[6-(1,1-dimethylethyl)-4-methyl-      | -     | 0.97 | -     |
| 94  | 44.87 | N-(2'-Benzoylphenyl)-2-phenylacetylenecarboxamide              | -     | 0.64 | -     |
| 98  | 44.87 | Dodecanamide, N-3-methylbutyl-                                 | 0.42  | -    | 1.87  |
| 99  | 44.93 | Myristamide, N-(3-methylbutyl)-                                | 0.91  | -    | -     |
| 95  | 44.93 | Octanoic acid, morpholide                                      | -     | 1.51 | -     |
| 96  | 46.06 | 10-Methyl-undecanoic acid, pyrrolidide                         | -     | 0.91 | -     |
| 100 | 46.07 | 12-Methyltridecanoic acid, pyrrolidide                         | 0.93  | -    | -     |
| 101 | 47.57 | Butanamide, N-heptyl-N-octyl-                                  | 0.57  | -    | -     |
| 97  | 47.68 | 3-[1-(4-Cyano-1,2,3,4-tetrahydronaphthyl)]propanenitrile       | -     | 0.80 | -     |
| 102 | 47.69 | Cyclobutanecarboxamide, N-heptyl-N-octyl-                      | 0.93  | -    | -     |
| 103 | 48.73 | 2,5-Piperazinedione, 3,6-bis(phenylmethyl)-                    | 0.36  | -    | -     |
